# Supplementary material
Source: publisher site journal article supplement (https://www.dovepress.com/article/279315)
Supplement: Supplementary file 1 [file get_supplementary_file.php]

**Appendix**

# **Supplementary Tables**

**Supplementary Table 1.** List of all participating GlaxoSmithKline investigational study sites from the ECLIPSE study

| **Region** | **Location** | **Postcode** |
| --- | --- | --- |
| Canada | Vancouver, British Columbia | V5Z 1M9 |
| Vancouver, British Columbia | V6Z 1Y6 |
| Halifax, Nova Scotia | B3H 3A7 |
| Hamilton, Ontario | L8N 3Z5 |
| Kingston, Ontario | K7L 2V7 |
| Montreal, Quebec | H2X 2P4 |
| Sainte-Foy, Quebec | G1V 4G5 |
| Europe | Pleven, Bulgaria | 5800 |
| Sofia, Bulgaria | 1000 |
| Praha 8, Czech Republic | 182 00 |
| Hvidovre, Denmark | 2650 |
| Horn, Netherlands | 6085 NM |
| Bergen, Norway | N-5021 |
| Golnik, Slovenia | 4204 |
| Palma de Mallorca, Spain | 07014 |
| Donetsk, Ukraine | 83003 |
| Kiev, Ukraine | 03680 |
| Kiev, Ukraine | 3680 |
| New Zealand | Wellington, New Zealand | 6035 |
| United Kingdom | Edinburgh, Scotland | EH16 4SA |
| Cambridge, England | CB2 2XY |
| Liverpool, England | L9 7AL |
| London, England | NW3 2QG |
| Manchester, England | M23 9LT |
| United States | Phoenix, Arizona | 85006 |
| Rancho Mirage, California | 92270 |
| Torrance, California | 90502 |
| Denver, Colorado | 80206 |
| Hartford, Connecticut | 06105 |
| New Haven, Connecticut | 06519 |
| Miami, Florida | 33136 |
| Baltimore, Maryland | 21224 |
| Boston, Massachusetts | 02115 |
| Boston, Massachusetts | 02135 |
| Rochester, Minnesota | 55905 |
| St. Charles, Missouri | 63301 |
| Omaha, Nebraska | 68131 |
| Omaha, Nebraska | 68198 |
| Lebanon, New Hampshire | 03756 |
| Pittsburgh, Pennsylvania | 15213 |
| Providence, Rhode Island | 02903 |
| Houston, Texas | 77030 |
| San Antonio, Texas | 78229 |
| Richmond, Virginia | 23225 |

Data source: <https://clinicaltrials.gov/ct2/show/NCT00292552>

**Supplementary Table 2.** Characteristics of patients experiencing early or late moderate/severe re‑exacerbation, or no re‑exacerbation, following a moderate or severe index exacerbation (cohort B)

|  | **Moderate index exacerbation** | | | **Severe index exacerbation** | | | **All patients in cohort B (N=1420)** |
| --- | --- | --- | --- | --- | --- | --- | --- |
| **Variable*** | **Early moderate/severe re‑exacerbation**  **(N = 365)** | **Late moderate/severe re‑exacerbation (N = 225)** | **No re-exacerbation**  **(N = 590)** | **Early moderate/severe re‑exacerbation**  **(N = 74)** | **Late moderate/severe re‑exacerbation (N = 40)** | **No re-exacerbation**  **(N = 126)** | **Patients with evaluable data, N** |
| **Mean (SD) age, years** | 63.9 (6.48) | 64.1 (7.18) | 64.1 (6.87) | 63.9 (7.06) | 65.5 (6.12) | 65.2 (7.28) | 1420 |
| **Female, n (%)†** | 145 (39.7) | 99 (44.0) | 221 (37.5) | 29 (39.2) | 11 (27.5) | 33 (26.2) | 1420 |
| **Education, n (%)†** |  |  |  |  |  |  |  |
| No, some or complete primary school | 72 (20.1) | 39 (17.6) | 108 (18.8) | 18 (25.0) | 11 (28.2) | 27 (22.1) | 1387 |
| Some or complete high school | 168 (46.4) | 112 (50.7) | 261 (45.4) | 27 (37.5) | 15 (38.5) | 52 (42.6) |
| Technical post-secondary/further education | 94 (26.3) | 49 (22.2) | 134 (23.3) | 22 (30.6) | 10 (25.6) | 36 (29.5) |
| University graduate/post graduate | 26 (7.3) | 21 (9.5) | 72 (12.5) | 5 (6.9) | 3 (7.7) | 7 (5.7) |
| **BMI category, n (%)** |  |  |  |  |  |  |  |
| Underweight: <18.5 | 22 (6.1) | 11 (5.0) | 33 (5.7) | 9 (12.5) | 4 (10.3) | 12 (9.5) | 1396 |
| Normal: 18.5–24.9 | 139 (38.6) | 81 (36.5) | 213 (36.9) | 37 (51.4) | 13 (33.3) | 40 (31.7) |
| Overweight: 25–29.9 | 128 (35.6) | 81 (36.5) | 203 (35.2) | 17 (23.6) | 14 (35.9) | 43. (34.1) |
| Obese: ≥30 | 71 (19.7) | 49 (22.1) | 128 (22.2) | 9 (12.5) | 8 (20.5) | 31 (24.6) |
| **Mean (SD) FFMI, kg/m2** | 17.5 (3.5) | 17.4 (3.2) | 17.6 (3.5) | 16.1 (3.4) | 17.3 (3.1) | 17.8 (3.6) | 1396 |
| **Smoking status, n (%)** |  |  |  |  |  |  |  |
| Current smoker | 122 (33.4) | 83 (36.9) | 207 (35.1) | 22 (29.7) | 16 (40) | 38 (30.2) | 1420 |
| Former smoker | 243 (66.6) | 142 (63.1) | 383 (64.9) | 52 (70.3) | 24 (60) | 88 (69.8) |
| **Comorbidities, n (%)†** |  |  |  |  |  |  |  |
| Hypertension | 132 (38.2) | 88 (40.7) | 233 (40.5) | 25 (36.2) | 13 (33.3) | 50 (41.7) | 1365 |
| Heart failure | 22 (6.4) | 19 (8.7) | 29 (5.1) | 6 (8.3) | 5 (13.5) | 11 (9.2) | 1364 |
| Heart attack | 37 (10.5) | 18 (8.3) | 46 (7.9) | 9 (12.2) | 2 (5.4) | 11 (9.1) | 1383 |
| Stroke | 15 (4.2) | 9 (4.1) | 20 (3.4) | 4 (5.5) | 1 (2.6) | 5 (4.1) | 1394 |
| Diabetes | 35 (9.9) | 21 (9.4) | 57 (9.9) | 3 (4.1) | 1 (2.6) | 10 (8.1) | 1391 |
| Reflux/heartburn | 117 (33.9) | 61 (28.1) | 154 (26.7) | 22 (31.4) | 11 (28.9) | 41 (33.9) | 1367 |
| Osteoporosis | 58 (17.1) | 43 (20.4) | 70 (12.7) | 17 (24.3) | 2 (5.6) | 17 (14.7) | 1325 |
| Asthma, confirmed by doctor | 82 (25.5) | 55 (26.8) | 85 (16.3) | 17 (26.6) | 7 (21.9) | 22 (18.6) | 1261 |
| Asthma, current | 102 (30.9) | 65 (31.1) | 121 (22.4) | 21 (32.3) | 10 (30.3) | 25 (21.6) | 1294 |
| Pneumonia, confirmed by doctor | 211 (62.1) | 139 (64.4) | 334 (60.5) | 56 (78.9) | 23 (62.2) | 72 (61.0) | 1334 |
| Sinus trouble, confirmed by doctor | 104 (30.4) | 61 (28.6) | 152 (27.4) | 17 (23.9) | 9 (24.3) | 34 (28.1) | 1339 |
| **COPD duration, years, n (%)** |  |  |  |  |  |  |  |
| <5 years | 100 (27.6) | 52 (23.4) | 170 (29.1) | 17 (23.3) | 12 (30.0) | 31 (24.8) | 1407 |
| 5–< 8 years | 85 (23.5) | 51 (23) | 155 (26.5) | 24 (32.9) | 6 (15.0) | 28 (22.4) |
| 8–< 13 years | 86 (23.8) | 65 (29.3) | 133 (22.7) | 13 (17.8) | 16 (40.0) | 37 (29.6) |
| ≥13 years | 91 (25.1) | 54 (24.3) | 127 (21.7) | 19 (26.0) | 6 (15.0) | 29 (23.2) |
| **GOLD Stage, n (%)** |  |  |  |  |  |  |  |
| II | 123 (33.7) | 89 (39.6) | 280 (47.5) | 10 (13.5) | 10 (25.0) | 38 (30.2) | 1420 |
| III | 169 (46.3) | 101 (44.9) | 251 (42.5) | 40 (54.1) | 19 (47.5) | 61 (48.4) |
| IV | 73 (20.0) | 35 (15.6) | 59 (10.0) | 24 (32.4) | 11 (27.5) | 27 (21.4) |
| **Mean (SD) post‑bronchodilator FEV1/FVC, L** | 0.42 (0.121) | 0.43 (0.114) | 0.45 (0.117) | 0.37 (0.093) | 0.41 (0.103) | 0.41 (0.12) | 1420 |
| **GOLD 2017 classification, n (%)** |  |  |  |  |  |  |  |
| A | 65 (17.8) | 63 (28.0) | 247 (41.9) | NA | NA | NA | 1420 |
| B | 93 (25.5) | 62 (27.6) | 199 (33.7) | NA | NA | NA |
| C | 59 (16.2) | 32 (14.2) | 63 (10.7) | 25 (33.8) | 15 (37.5) | 35 (27.8) |
| D | 148 (40.5) | 68 (30.2) | 81 (13.7) | 49 (66.2) | 25 (62.5) | 91 (72.2) |
| **mMRC score category, n (%)** |  |  |  |  |  |  |  |
| None/mild | 124 (34.0) | 95 (42.2) | 310 (52.5) | 25 (33.8) | 15 (37.5) | 35 (27.8) | 1420 |
| Moderate/severe | 241 (66.0) | 130 (57.8) | 280 (47.5) | 49 (66.2) | 25 (62.5) | 91 (72.2) |
| **CMH by SGRQ definition, n (%)** |  |  |  |  |  |  |  |
| Yes | 211 (58.1) | 122 (55.2) | 312 (53.6) | 50 (69.4) | 23 (57.5) | 64 (51.2) | 1403 |
| No | 152 (41.9) | 99 (44.8) | 270 (46.4) | 22 (30.6) | 17 (42.5) | 61 (48.8) |
| **Mean (SD) SGRQ total score** | 53.3 (16.7) | 50.0 (16.8) | 44.9 (17.5) | 56.8 (15.7) | 59.7 (18.1) | 53.3 (18.1) | 1382 |
| **CES-D score, n (%)** |  |  | |  |  |  |  |
| <16 | 238 (65.4) | 165 (74.0) | 448 (76.6) | 52 (71.2) | 20 (51.3) | 90 (71.4) | 1410 |
| ≥16 | 126 (34.6) | 58 (26.0) | 137 (23.4) | 21 (28.8) | 19 (48.7) | 36 (28.6) |
| **Mean (SD) FACIT score** | 21.2 (8.2) | 22.2 (7.8) | 24.1 (7.9) | 20.8 (8.0) | 19.9 (8.4) | 20.7 (8.8) | 1403 |
| **Distanced walked, n (%) m** |  |  |  |  |  |  |  |
| <350 m | 172 (48.2) | 83 (37.6) | 214 (36.8) | 32 (46.4) | 21 (56.8) | 63 (52.1) | 1386 |
| ≥350 m | 185 (51.8) | 138 (62.4) | 367 (63.2) | 37 (53.6) | 16 (43.2) | 58 (47.9) |
| **BODE index, terciles (n, %)** |  |  |  |  |  |  |  |
| 0–≤2 | 106 (29.8) | 81 (36.7) | 287 (49.4) | 13 (18.8) | 7 (18.9) | 29 (24.0) | 1385 |
| >2–≤4 | 117 (32.9) | 81 (36.7) | 186 (32.0) | 25 (36.2) | 13 (35.1) | 46 (38.0) |
| >4 | 133 (37.4) | 59 (26.7) | 108 (18.6) | 31 (44.9) | 17 (45.9) | 46 (38.0) |
| **Radiological subtypes, n (%)** |  |  |  |  |  |  |  |
| Bronchiectasis | 21 (6.1) | 6 (2.8) | 19 (3.5) | 4 (5.6) | 1 (2.6) | 4 (3.8) | 1318 |
| Emphysema | 334 (96.3) | 207 (96.7) | 513 (94.6) | 68 (95.8) | 37 (97.4) | 104 (98.1) | 1318 |
| **Blood eosinophils group, n (%) GI/L** |  |  |  |  |  |  |  |
| 0–<0.15 | 126 (34.7) | 76 (34.2) | 184 (31.3) | 33 (45.2) | 17 (42.5) | 49 (39.2) | 1411 |
| 0.15–<0.30 | 133 (36.6) | 93 (41.9) | 285 (48.5) | 21 (28.8) | 16 (40.0) | 49 (39.2) |
| ≥0.30 | 104 (28.7) | 53 (23.9) | 119 (20.2) | 19 (26.0) | 7 (17.5) | 27 (21.6) |
| **Blood neutrophils group, n (%) GI/L** |  |  |  |  |  |  |  |
| 0–<6 | 252 (69.4) | 160 (72.1) | 455 (77.4) | 57 (78.1) | 30 (75.0) | 86 (68.8) | 1411 |
| 6–<9 | 95 (26.2) | 55 (24.8) | 116 (19.7) | 12 (16.4) | 9 (22.5) | 36 (28.8) |
| ≥9 | 16 (4.4) | 7 (3.2) | 17 (2.9) | 4 (5.5) | 1 (2.5) | 3 (2.4) |
| **Gmean (GSD) serum hsCRP, mg/L** | 4.6 (3.9) | 9.6 (5.1) | 6 (3.6) | 5.8 (3.3) | 6.1 (4.0) | 5.9 (3.1) | 149 |
| **Gmean (GSD) blood fibrinogen, mg/dL** | 459.6 (1.2) | 450.7 (1.3) | 440.1 (1.2) | 456.4 (1.2) | 417 .3 (1.4) | 443.6 (1.3) | 1019 |
| **Any COPD maintenance medication,‡ n (%)** | 228 (97.0) | 143 (97.3) | 407 (99.0) | 46 (95.8) | 29 (93.5) | 78 (97.5) | 934 |
| **Treatment of index exacerbation, n (%)** |  |  |  |  |  |  |  |
| Steroids and antibiotics | 150 (41.1) | 89 (39.6) | 182 (30.8) | 50 (67.6) | 26 (65.0) | 88 (69.8) | 1420 |
| Steroids only | 46 (12.6) | 30 (13.3) | 83 (14.1) | 10 (13.5) | 2 (5.0) | 8 (6.3) |
| Antibiotics only | 169 (46.3) | 106 (47.1) | 325 (55.1) | 14 (18.9) | 12 (30.0) | 27 (21.4) |
| No steroids/antibiotics | NA | NA | NA | NA | NA | 3 (2.4) |
| **Timing of index exacerbation, n (%)** |  |  |  |  |  |  |  |
| <18 months from ECLIPSE start | 347 (95.1) | 200 (88.9) | 503 (85.3) | 68 (91.9) | 37 (92.5) | 99 (78.6) | 1420 |
| ≥18 months from ECLIPSE start | 18 (4.9) | 25 (11.1) | 87 (14.7) | 6 (8.1) | 3 (7.5) | 27 (21.4) |
| **≥2 moderate or ≥1 severe AECOPD event on or before index date, n (%)** | 207 (56.7) | 100 (44.4) | 144 (24.4) | 74 (100.0) | 40 (100.00) | 126 (100.0) | 1420 |
| **Seasonality§ of index exacerbation, n (%)** |  |  |  |  |  |  |  |
| Winter | 111 (31.4) | 67 (30.9) | 210 (36.1) | 26 (36.6) | 12 (30.0) | 51 (40.5) | 1389 |
| Spring | 45 (12.7) | 40 (18.4) | 128 (22.0) | 7 (9.9) | 7 (17.5) | 24 (19.0) |
| Summer | 56 (15.9) | 40 (18.4) | 87 (14.9) | 12 (16.9) | 15 (37.5) | 20 (15.9) |
| Autumn | 141 (39.9) | 70 (32.3) | 157 (27.0) | 26 (36.6) | 6 (15.0) | 31 (24.6) |

*All variables, unless otherwise stated, were measured at the nearest visit or data collection prior to the index date.

†Variable measured at ECLIPSE baseline.

‡Any use of LABA and/or LAMA as monotherapy or in combination with an ICS.

§Southern hemisphere countries (New Zealand) are excluded.

AECOPD, acute exacerbation of COPD; BMI, body mass index; BODE, Body mass index, airflow Obstruction, Dyspnea and Exercise; CES-D score, Center for Epidemiologic Studies Depression score; CMH, chronic mucus hypersecretion; COPD, chronic obstructive pulmonary disease; ECLIPSE, Evaluation of COPD Longitudinally to Identify Predictive Surrogate Endpoints; FACIT, Functional Assessment of Chronic Illness Therapy; FEV1, forced expiratory volume in 1 second; FFMI, fat-free mass index; FVC, forced vital capacity; Gmean, geometric mean; GOLD, Global Initiative for Chronic Obstructive Lung Disease; GSD, geometric standard deviation; hsCRP, high-sensitivity C-reactive protein; ICS, inhaled corticosteroid; LABA, long-acting β2-agonist; LAMA, long-acting muscarinic antagonist; mMRC, modified Medical Research Council; NA, not available; SD, standard deviation; SGRQ, St. George’s Respiratory Questionnaire.

# **Supplementary Figures**

**Supplementary Figure 1.** Agreement chart of the final model used to identify factors predictive of early, late, and no re-exacerbation.


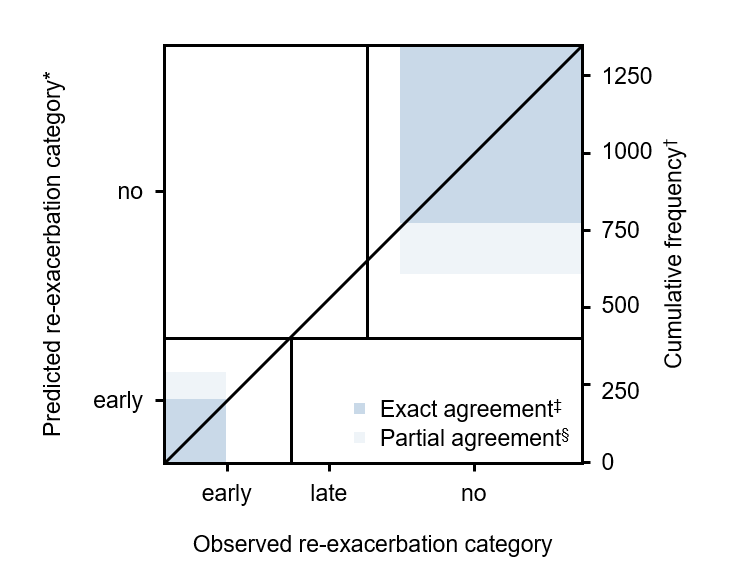
In the case of perfect agreement, the chart would include a single dark square for each re‑exacerbation category centered along the diagonal line: the rectangles determined by the marginal totals would all be perfect squares and the shaded squares determined by the diagonal cell entries would be exactly equal to the rectangles

*“Late” is missing because the model did not predict any observations in the late category

†The number of patients in each predicted re‑exacerbation category (early re-exacerbation and no re‑exacerbation)

‡Early re-exacerbators predicted as early re-exacerbators (bottom left) and no re‑exacerbators predicted as no re-exacerbators (top right)

§Late re-exacerbators that were predicted as early re-exacerbators (bottom left) or no re-exacerbators (top right)
